# Overexpression of sedoheptulose-1,7-bisphosphatase enhances photosynthesis in *Chlamydomonas reinhardtii* and has no effect on the abundance of other Calvin-Benson cycle enzymes

1 Alexander Hammel<sup>1</sup>, Frederik Sommer<sup>1</sup>, David Zimmer<sup>2</sup>, Mark Stitt<sup>3</sup>, Timo Mühlhaus<sup>2</sup>, Michael  
2 Schroda<sup>1\*</sup>

3 <sup>1</sup> Molecular Biotechnology & Systems Biologie, TU Kaiserslautern, 67663 Kaiserslautern, Germany

4 <sup>2</sup> Computational Systems Biology, TU Kaiserslautern, 67663 Kaiserslautern, Germany

5 <sup>3</sup> Max-Planck-Institute of Molecular Plant Physiology, 14476 Potsdam-Golm, Germany

6

7 \* **Correspondence:** Michael Schroda [schroda@bio.uni-kl.de](mailto:schroda@bio.uni-kl.de)

8 **Keywords:** Mass spectrometry, proteotypic peptide, QconCAT, Synthetic Biology, Modular  
9 Cloning, photosynthesis, *Chlamydomonas reinhardtii*

10

## 11 Abstract

12 The productivity of plants and microalgae needs to be increased to feed the growing world population  
13 and to promote the development of a low-carbon economy. This goal can be achieved by improving  
14 photosynthesis via genetic engineering. In this study, we have employed the Modular Cloning strategy  
15 to overexpress the Calvin-Benson cycle (CBC) enzyme sedoheptulose-1,7 bisphosphatase (SBP1) up  
16 to 3-fold in the unicellular green alga *Chlamydomonas reinhardtii*. The protein derived from the  
17 nuclear transgene represented ~0.3% of total cell protein. Photosynthetic rate and growth were  
18 significantly increased in SBP1-overexpressing lines under high-light and high-CO<sub>2</sub> conditions.  
19 Absolute quantification of the abundance of all other CBC enzymes by the QconCAT approach  
20 revealed no consistent differences between SBP1-overexpressing lines and the recipient strain. This  
21 analysis also revealed that the eleven CBC enzymes represent 11.9% of total cell protein in  
22 *Chlamydomonas*. Here the range of concentrations of CBC enzymes turned out to be much larger than  
23 estimated earlier, with a 128-fold difference between the most abundant CBC protein (rbcL) and the  
24 least abundant (triose phosphate isomerase). Accordingly, the concentrations of the CBC intermediates  
25 are often but not always higher than the binding site concentrations of the enzymes for which they act  
26 as substrates. The enzymes with highest substrate to binding site ratios might represent good candidates  
27 for overexpression in subsequent engineering steps.

28

29

30

31

## 32 1 Introduction

33 An increased productivity of plants and microalgae is required to feed the growing world population  
34 and to promote the development of a low-carbon economy. One way to increase plant and microalgal  
35 productivity is to improve photosynthesis by genetic engineering. Engineering efforts that have  
36 resulted in increased biomass are the rewiring of photorespiration (Kebeish et al., 2007;Nolke et al.,  
37 2014), the improvement of linear electron transport between the photosystems (Chida et al.,  
38 2007;Simkin et al., 2017b), or the overexpression of distinct Calvin-Benson-Cycle (CBC) enzymes  
39 (for recent reviews see Simkin et al. (2019) and Kubis and Bar-Even (2019)). The rationale behind the  
40 latter approach is that the rising concentration of atmospheric CO<sub>2</sub> caused by the burning of fossil fuels  
41 increases the velocity of the carboxylation reaction of Rubisco and inhibits the competing oxygenation  
42 reaction. This results in a shift in the limitation of photosynthesis away from carboxylation of ribulose  
43 1,5-bisphosphate (RuBP) and towards RuBP regeneration. The CBC enzyme sedoheptulose-1,7  
44 bisphosphatase (SBPase) has been shown to exert strong metabolic control over RuBP regeneration at  
45 light saturation, as it is positioned at the branch point between regenerative (RuBP regeneration) and  
46 assimilatory (starch biosynthesis) portions of the CBC. SBPase catalyzes the irreversible  
47 dephosphorylation of sedoheptulose1,7-bisphosphate (SBP) to sedoheptulose-7-phosphate (S7P).  
48 Accordingly, the overexpression of SBPase alone (Lefebvre et al., 2005;Tamoi et al., 2006;Feng et al.,  
49 2007;Rosenthal et al., 2011;Fang et al., 2012;Ding et al., 2016;Driever et al., 2017;Simkin et al., 2017a)  
50 or of the cyanobacterial bifunctional SBPase/FBPase (BiBPase) (Miyagawa et al., 2001;Yabuta et al.,  
51 2008;Ichikawa et al., 2010;Gong et al., 2015;Ogawa et al., 2015;Kohler et al., 2017;De Porcellinis et  
52 al., 2018) resulted in marked increases in photosynthesis and biomass yields in tobacco, lettuce,  
53 *Arabidopsis thaliana*, wheat, tomato, rice, soybean, and in the microalgae *Synechococcus*, *Euglena*  
54 *gracilis* and *Dunaliella bardawil*.

55 Genetic engineering often is an iterative process essentially consisting of four steps: (i) the design  
56 and manufacturing of a gene construct, (ii) its transfection into the target organism and the recovery of  
57 transgenic lines, (iii) the screening for expressing transformants, and (iv) the readout of the trait to be  
58 altered, on which basis the gene construct for the next cycle is designed. The cloning steps used to be  
59 a time constraint, which was overcome by new cloning strategies like Gibson assembly or Modular  
60 Cloning (MoClo) for Synthetic Biology that allow the directed assembly of multiple genetic parts in a  
61 single reaction (Gibson et al., 2009;Weber et al., 2011). Still a major time constraint (months) in the  
62 genetic engineering of plants is the recovery of a transfected plant and its propagation for reading out  
63 the altered trait. This constraint can only be overcome by using plant models with short generation  
64 times, like microalgae.

65 A potential problem of genetic engineering are undesired side effects of the genetic engineering  
66 that can best be revealed by system-wide approaches. One way is to compare the proteomes of wild  
67 type and engineered lines by quantitative proteomics (Gillet et al., 2016). A more targeted approach is  
68 the use of so-called quantification concatamers (QconCATs) (Beynon et al., 2005;Pratt et al., 2006).  
69 QconCATs consist of concatenated proteotypic peptides, an affinity tag allowing purification under  
70 denaturing conditions and, optionally, amino acids like cysteine or tryptophan for easy quantification.  
71 The QconCAT protein is expressed with a heavy label in *E. coli* from an *in silico* designed, codon-  
72 optimized synthetic gene cloned into an expression vector. A known amount of the QconCAT protein  
73 is then added to the sample and, upon tryptic digestion, the heavy proteotypic peptides from the  
74 QconCAT protein are released together with the corresponding light peptides from the parent proteins.  
75 All QconCAT peptides are present in a strict 1:1 ratio at the concentration determined for the entire  
76 protein. After ionization, the pairs of heavy QconCAT peptides and light native peptides can be  
77 separated and quantified by mass spectrometry, with the heavy peptides serving as calibrators allowing

78 absolute quantification of the target proteins in the sample. This method is limited to about 20 targets  
79 per QconCAT protein.

80 The aim of this work was to provide a proof of principle for a rapid metabolic engineering  
81 workflow to improve photosynthesis. We chose to overexpress SBPase via the MoClo strategy, the  
82 unicellular green alga *Chlamydomonas* as a chassis, and QconCAT-based absolute quantification as a  
83 tool for monitoring effects on other CBC enzymes.

## 84 **2 Material and Methods**

### 85 **2.1 Growth of *Chlamydomonas* cells**

86 *Chlamydomonas reinhardtii* UVM4 cells (Neupert et al., 2009) were grown in Tris-Acetate-Phosphate  
87 (TAP) medium (Kropat et al., 2011) on a rotatory shaker. For transformation, cells were grown at a  
88 light intensity of 100  $\mu\text{mol photons m}^{-2} \text{s}^{-1}$  to a density of  $5 \times 10^6$  cells/ml and collected by  
89 centrifugation at 4000 g for 2 min.  $5 \times 10^7$  cells were mixed with 1  $\mu\text{g}$  DNA linearized with *NotI* and  
90 transformed by vortexing with glass beads (Kindle, 1990). Vortexed cells were diluted 2-fold with  
91 TAP and  $2.5 \times 10^7$  cells were spread onto TAP agar plates containing 100  $\mu\text{g ml}^{-1}$  spectinomycin.  
92 Plates were incubated over-night in the dark and then incubated at 30  $\mu\text{mol photons m}^{-2} \text{s}^{-1}$  for about  
93 ten days. For growth curves, cells were inoculated in 100 ml TAP medium and grown at 150  $\mu\text{mol}$   
94  $\text{photons m}^{-2} \text{s}^{-1}$  to a density of about  $8 \times 10^6$  cells/ml. 100 ml TAP or Hepes-Minimal-Phosphate (HMP)  
95 medium (5 mM Hepes-KOH instead of 20 mM Tris, no acetate) were then inoculated with  $3 \times 10^5$   
96 cells/ml in triplicates for each strain and growth was monitored by cell counting using the Z2 Coulter  
97 Particle Count and Size Analyzer (Beckmann). The culture volume is the summed cell volume of all  
98 cells in one ml medium. For mass spectrometry analyses, samples were harvested 22 h after inoculation  
99 (early log phase).

### 100 **2.2 Measurement of oxygen evolution**

101 Cells were inoculated in 50 ml TAP medium and grown overnight to early log phase. Oxygen  
102 measurements were performed in the Mini-PAM-II (Walz, Germany) device using the needle-type  
103 oxygen microsensor OXR-50 (Pyroscience, Germany). Before the measurements, the cell density was  
104 determined, and an aliquot was taken to determine the chlorophyll concentration. The PAM chamber  
105 was filled with 400  $\mu\text{l}$  of *Chlamydomonas* culture and  $\text{NaHCO}_3$  was added to a final concentration of  
106 30 mM. Cells were dark-adapted for 5 min and far-red light adapted for another 5 min. Then light with  
107 the intensities of 16, 29, 42, 58, 80, 122, 183, 269, 400, 525, 741 and 963  $\mu\text{mol photons m}^{-2} \text{s}^{-1}$  was  
108 applied for 2 min each and oxygen evolution was monitored.

### 109 **2.3 Cloning of the *Chlamydomonas SBP1* gene for MoClo**

110 Our constructs are based on the Phytozome 12 annotation of the genomic version of the  
111 *Chlamydomonas SBP1* gene (Cre03.g185550) with seven exons and six introns. However, we used the  
112 first ATG in the 5' UTR as start codon instead of the third proposed by Phytozome. To domesticate a  
113 *BsaI* recognition site in the fifth exon (GAGACC  $\rightarrow$  GAGACA), the *SBP1* gene was PCR-amplified  
114 on total *Chlamydomonas* DNA in two fragments with primers 5'-  
115 **TTGAAGACATAATGGCCGCTATGATGATGC**-3' and 5'-  
116 **ACGAAGACGGGTTGTCTCCTTGACGTGC**-3' for fragment 1 (1257 bp) and with primers 5'-  
117 **TTGAAGACGGCAACCCACATCGGTGAG**-3' and 5'-  
118 **TTGAAGACTCCGAACCGGCAGCCACCTTCTCAGAG**-3' for fragment 2 (963 bp; *BpiI* sites in  
119 bold letters). PCR was done with Q5 High-Fidelity Polymerase (NEB) following the manufacturer's

120 instructions and in the presence of 10% DMSO. The two PCR products were combined with destination  
121 vector pAGM1287 (Weber et al., 2011), digested with BpiI and directionally assembled by ligation  
122 into level 0 construct pMBS516. The latter was then combined with plasmids pCM0-020 (*HSP70A*-  
123 *RBCS2* promoter + 5'UTR), pCM0-101 (MultiStop) or pCM0-100 (3xHA), and pCM0-119 (*RPL23*  
124 3'UTR) from the *Chlamydomonas* MoClo kit (Crozet et al., 2018) as well as with destination vector  
125 pICH47742 (Weber et al., 2011), digested with BsaI and ligated to generate level 1 constructs  
126 pMBS517 (L1-SBP1-mStop) and pMBS518 (L1-SBP1-3xHA). Both level 1 constructs were then  
127 combined with pCM1-01 (level 1 construct with the *aadA* gene conferring resistance to spectinomycin  
128 flanked by the *PSAD* promoter and terminator) from the *Chlamydomonas* MoClo kit, with plasmid  
129 pICH41744 containing the proper end-linker, and with destination vector pAGM4673 (Weber et al.,  
130 2011), digested with BpiI, and ligated to yield level 2 constructs pMBS519 (*aadA*+*SBP1*-mStop) and  
131 pMBS520 (*aadA*+*SBP1*-3xHA). Correct cloning was verified by Sanger sequencing

## 132 **2.4 Screening of SBP1 overexpressing lines**

133 Transformants were grown in TAP medium until mid-log phase and harvested by centrifugation at  
134 13,000 g for 5 min at 25°C. Cells were resuspended in DTT-carbonate buffer (100 mM DTT; 100 mM  
135 Na<sub>2</sub>CO<sub>3</sub>), supplemented with SDS and sucrose at final concentrations of 2 % and 12 %, respectively,  
136 vortexed, heated to 95°C for 5 min, and centrifuged at 13,000 g for 5 min at 25°C. The chlorophyll  
137 content was determined as described by (Vernon, 1960). Total proteins according to 1.5 µg total  
138 *Chlamydomonas* chlorophyll were loaded on a 12 % SDS-polyacrylamide gel and analyzed by  
139 immunoblotting using a mouse anti-HA antibody (Sigma H9658, 1:10,000) for transformants with  
140 SBP1-3xHA or a rabbit anti-SBPase antibody (Agriseria AS15 2873, 1:2,500) for SBP1-mStop.  
141 Detection was done via enhanced chemiluminescence using the FUSION-FX7 device (Peqlab).

## 142 **2.5 QconCAT protein expression and purification**

143 The coding sequence for the Calvin-Benson cycle QconCAT protein (CBC-Qprot) was codon-  
144 optimized for *E. coli*, synthesized by Biocat (Heidelberg) harboring BamHI/HindIII restriction sites,  
145 cloned into the pET-21b expression vector (Novagen), and transformed into *E. coli* ER2566 cells (New  
146 England Biolabs). Expression of CBC-Qprot as a <sup>15</sup>N-labeled protein and purification via Co-NTA  
147 affinity chromatography and electroelution was performed as described previously for the  
148 photosynthesis QconCAT protein (PS-Qprot) (Hammel et al., 2018). The eluted protein was  
149 concentrated, and the buffer changed to 6 M urea using Amicon ultra-15 centrifugal filter units with  
150 10,000 MWCO (Merck). The protein concentration was determined spectroscopically at 280 nm on a  
151 NanoDrop™ spectrophotometer based on the Lambert-Beer's law assuming a molecular weight of the  
152 CBC-Qprot of 47921 Da and an extinction coefficient of 37,400 M<sup>-1</sup> cm<sup>-1</sup>. The protein concentration  
153 was adjusted to 1 µg/µl and the protein was stored at -20°C.

## 154 **2.6 In solution tryptic digest and LC-MS/MS analysis**

155 Twenty micrograms of total *Chlamydomonas* protein, as determined by the Lowry assay (Lowry et al.,  
156 1951), were mixed with 12.5, 25, 50, and 100 ng CBC- and PS-Qprot for replicates 1-3, and with 25,  
157 50, 100, and 200 ng CBC- and PS-Qprot for replicates 4-6. Proteins were then precipitated with ice-  
158 cold 80% acetone overnight and digested as described previously (Hammel et al., 2018). 1 µg of the  
159 CBC-Qprot was precipitated with acetone without *Chlamydomonas* protein to obtain ion  
160 chromatograms for the Q-peptides alone. Tryptic peptides corresponding to 10 µg were desalted on  
161 home-made C18-STAGE tips (Empore) as described by (Rappsilber et al., 2007), eluted with 80%  
162 acetonitrile/2% formic acid, dried to completion in a speed vac and stored at -20°C. Peptides were  
163 resuspended in a solution of 2% acetonitrile, 2% formic acid just before the LC-MS/MS run. The LC-

164 MS/MS system (Eksigent nanoLC 425 coupled to a TripleTOF 6600, ABSciex) was operated in  $\mu$ -  
165 flow mode using a 25  $\mu$ -emitter needle in the ESI source. Peptides were separated by reversed phase  
166 (Triart C18, 5  $\mu$ m particles, 0.5 mm  $\times$  5 mm as trapping column and Triart C18, 3  $\mu$ m particles, 300  
167  $\mu$ m  $\times$  150 mm as analytical column, YMC) using a flow rate of 4  $\mu$ l/min and gradients from 2 to 35%  
168 HPLC buffer B (buffer A: 2% acetonitrile, 0.1% formic acid; buffer B: 90% acetonitrile, 0.1% formic  
169 acid). The efficiency of  $^{15}$ N incorporation in the labeled peptides was estimated according to (Schaff  
170 et al., 2008). The intensities for the monoisotopic, fully  $^{15}$ N labeled peak (Mi) and the preceding, first  
171 unlabeled peak (Mi-1), containing one  $^{14}$ N, were extracted using PeakView v2.2 software (ABSciex)  
172 and used for calculating the labeling efficiency ( $99.39 \pm 0.37\%$  (SD)). BioFsharp was used for the  
173 extraction of ion chromatograms and for the quantification of peak areas of heavy Q-peptides and light  
174 native peptides.

### 175 **3 Results**

#### 176 **3.1 Construction of *Chlamydomonas* strains overexpressing sedoheptulose-1,7-bisphosphatase** 177 **(SBP1)**

178 The *Chlamydomonas SBP1* gene encodes sedoheptulose-1,7-bisphosphatase of the CBC. We chose to  
179 use the genomic version of the gene including all seven exons and six introns to adapt it to the MoClo  
180 syntax (Weber et al., 2011; Patron et al., 2015). For this, we followed the protocol suggested previously  
181 (Schroda, 2019), which required two PCR amplifications to alter sequences around the start and stop  
182 codons and to remove an internal BpiI recognition site (Figure 1A). Using the *Chlamydomonas* MoClo  
183 toolkit (Crozet et al., 2018), the domesticated *SBP1* gene was equipped with the strong constitutive  
184 *HSP70A-RBCS2* fusion promoter (A( $\Delta$ -467)-R) and the *RPL23* terminator (Strenkert et al.,  
185 2013; Lopez-Paz et al., 2017). We generated two variants, one encoding a 3xHA tag at the C-terminus  
186 (SBP1-3xHA), the other lacking any tags (SBP1-mStop) (Figure 1A). HA-tagged proteins are easy to  
187 screen for, because the anti-HA antibody used reacts strongly with the 3xHA tag and has little  
188 background on immunoblots with *Chlamydomonas* total proteins. This allows assessing the frequency  
189 and variance with which transformants express the transgenic protein, and whether it has the expected  
190 size. This information can then be used for the screening of transformants expressing the untagged  
191 transgenic protein, which is the preferable variant because the 3xHA tag might interfere with the  
192 protein's function. After adding an *aadA* cassette to the constructs (Figure 1A), they were transformed  
193 into the *Chlamydomonas* UVM4 strain that expresses transgenes efficiently (Neupert et al., 2009). Of  
194 the 12 SBP1-3xHA transformants screened, three did not express the transgene and five expressed it  
195 to high levels (Figure 1B). A similar pattern was observed for the 12 SBP1-mStop transformants, of  
196 which three appeared not to express the transgene and three expressed it to high levels. The two best-  
197 expressing transformants of each construct were selected for further analyses.

#### 198 **3.2 Monitoring SBP1-overexpressing lines for improved photosynthetic rate and growth**

199 We first tested the four SBP1-overexpressing transformants for improved growth. As elevated SBPase  
200 activity has resulted in improved growth particularly under high light and high CO<sub>2</sub> conditions  
201 (Miyagawa et al., 2001; Lefebvre et al., 2005; Tamoi et al., 2006; Ichikawa et al., 2010; Gong et al.,  
202 2015; Ogawa et al., 2015; Driever et al., 2017; De Porcellinis et al., 2018), we chose to grow the  
203 transformants under mixotrophic conditions with acetate in the medium at a light intensity of 150  $\mu$ mol  
204 photons  $m^{-2} s^{-1}$  (our standard growth light intensity is 40  $\mu$ mol photons  $m^{-2} s^{-1}$ ). When *Chlamydomonas*  
205 cells use acetate as a carbon source, they generate a CO<sub>2</sub>-enriched environment by respiration. As  
206 shown in Figure 2A, both SBP1-mStop transformants (St1 and St12) accumulated significantly higher  
207 ( $p < 0.001$ ) culture volumes after 44 h and 52 h of growth and therefore reached stationary phase about  
208 14 h earlier than the UVM4 recipient strain. Growth of the HA5 transformant did not differ from that

209 of UVM4 and growth of HA11 even lagged behind that of UVM4. To test whether the enhanced growth  
210 rate of the SBP1-mStop transformants was due to an improved photosynthetic rate, we monitored the  
211 photosynthetic light response curves for UVM4 and the two SBP1-mStop lines. For this, we measured  
212 oxygen evolution as a function of applied light intensity under mixotrophic growth conditions (Figure  
213 2B). Rates of oxygen evolution of the UVM4 strain were comparable with those measured earlier in  
214 another strain background (CC-125), and both strains exhibited maximal oxygen evolution at 450  $\mu\text{mol}$   
215 photons  $\text{m}^{-2} \text{s}^{-1}$  (Wykoff et al., 1998). While UVM4 and the four transformants evolved oxygen with  
216 similar rates at light intensities of up to 183  $\mu\text{mol}$  photons  $\text{m}^{-2} \text{s}^{-1}$ , the SBP1-mStop lines started to  
217 evolve more oxygen at light intensities exceeding 183  $\mu\text{mol}$  photons  $\text{m}^{-2} \text{s}^{-1}$  and this became significant  
218 ( $p < 0.05$ ) at light intensities of 520  $\mu\text{mol}$  photons  $\text{m}^{-2} \text{s}^{-1}$  and above. Under photoautotrophic growth  
219 conditions at a light intensity of 150  $\mu\text{mol}$  photons  $\text{m}^{-2} \text{s}^{-1}$  we observed no difference in growth between  
220 all strains, presumably because they were  $\text{CO}_2$  limited (Figure 2C). We found no differences in  
221 chlorophyll content between the strains (t-test,  $p > 0.05$ ,  $n=3$ ).

### 222 **3.3 Absolute quantification of all CBC enzymes in *Chlamydomonas* by the QconCAT strategy**

223 We observed improved growth for the SBP1-mStop transformants but not for the SBP1-3xHA  
224 transformants. We reasoned that this could have been due to higher SBP1 expression levels in the  
225 former, or due to a negative effect of the 3xHA tag on the protein's function in the latter. To distinguish  
226 between these possibilities and to elucidate whether SBP1 overexpression affected the expression of  
227 the other ten CBC enzymes, we quantified the absolute levels of all CBC enzymes in the UVM4  
228 recipient strain and the four SBP1-overexpressing transformants with the QconCAT strategy. With this  
229 approach, using a single QconCAT protein (PS-Qprot), we already had determined the absolute cellular  
230 quantities of the complexes involved in the photosynthetic light reactions and of the Rubisco *rbcL* and  
231 RBCS subunits (Hammel et al., 2018). We designed a QconCAT protein (CBC-Qprot) that covered  
232 each of the missing ten CBC enzymes with two or three proteotypic tryptic Q-peptides (Supplemental  
233 Figure 1A; Supplemental Dataset 1). These Q-peptides have been detected by LC-MS/MS in earlier  
234 studies with good ion intensities and normal retention times. We had selected them before the d::pPOP  
235 algorithm for predicting ionization propensities was available (Zimmer et al., 2018) and therefore some  
236 peptides are not the very best choice (see d::pPop ranks and scores in Table 1).

237 The 47.9-kDa CBC-Qprot was expressed as  $^{15}\text{N}$ -labeled protein in *E. coli* and purified via the  
238 tandem-hexa-histidine tag at its C-terminus. The protein was further purified by preparative  
239 electrophoresis on an SDS-polyacrylamide gel, followed by electroelution of the protein from the  
240 excised gel band and spectroscopic quantification. Correct quantification and purity was verified by  
241 separating the CBC-Qprot together with a BSA standard on an SDS-polyacrylamide gel and staining  
242 with Coomassie blue (Supplemental Figure 1B). The CBC-Qprot was then tryptically digested and  
243 released peptides analyzed by LC-MS/MS using a short 6-min gradient (Supplemental Figure 1C). The  
244 latter shows that the Q-peptides separated with characteristic retention times and ion intensities.  
245 Despite the strict 1:1 stoichiometry of the peptides, the areas of the extracted ion chromatograms  
246 (XICs) varied by a factor of up to 370.

247 Four different amounts of the  $^{15}\text{N}$ -labeled PS-Qprot (Hammel et al., 2018) and the CBC-Qprot  
248 were mixed with 20  $\mu\text{g}$  of ( $^{14}\text{N}$ ) whole-cell proteins extracted from samples of UVM4 and the four  
249 transformants taken 22 h after inoculation in the experiment shown in Figure 1A (early log phase). We  
250 employed only one preparation of the QconCAT proteins, but up to six independent samples of  
251 *Chlamydomonas* cells. Mixed proteins were precipitated with acetone, followed by tryptic digestion in  
252 urea and LC-MS/MS analysis on 45-min analytical gradients. The ion chromatograms of heavy Q-

253 peptide and light native peptide pairs were extracted, XICs quantified, and ratios calculated  
254 (Supplemental Dataset 2).

255 Based on the Q-peptide to native peptide ratios and the known amounts of spiked-in QconCAT  
256 proteins, the abundances of the native peptides in the sample were calculated (in femtomoles per  $\mu\text{g}$   
257 cell protein) (Supplemental Dataset 2). We determined that a *Chlamydomonas* UVM4 cell contains  
258  $27.6 \pm 1.7$  pg protein (SD,  $n = 6$ ), which allowed us to calculate the absolute amount of each peptide  
259 in attomol per cell (Table 1). We used the median of all quantification values of the 2-3 Q-peptides per  
260 protein (23 to 72 values) to get an estimate for the abundance of each CBC protein per cell (Table 1).  
261 Moreover, based on these median values and the molecular weight of the mature proteins, the fraction  
262 of each target protein in the whole-cell protein extract was estimated (Table 1), revealing that CBC  
263 enzymes represent  $\sim 11.9\%$  of total cell protein in *Chlamydomonas* (Supplemental Dataset 2). This  
264 procedure was repeated for all four SBP1-overexpressing transformants and the log<sub>2</sub>-fold change of  
265 the abundance of each CBC enzyme in the transformants versus the UVM4 strain was calculated  
266 (Figure 3; Supplemental Dataset 2). It turned out that SBP1 was significantly ( $p < 0.01$ ) overexpressed  
267 in all transformants (HA5: 1.6-fold; HA11: 1.7-fold; St1: 3-fold; St12: 2.2-fold). Except for the  
268 Rubisco subunits, levels of all other CBC enzymes were not significantly different between the SBP1-  
269 overexpressing transformants and the UVM4 strain. Compared to UVM4, transformant HA11 had  
270 significantly lower RBCS levels (but only by 8%), and transformant St12 had significantly lower levels  
271 of RBCS and rbcL (by about 40%).

### 272 **3.4 Estimation of substrate binding sites per CBC enzyme**

273 In a previous study, we had determined the levels of all CBC metabolites in *Chlamydomonas* cells  
274 during an increase in light intensity within the range where irradiance remains limiting for  
275 photosynthesis (Mettler et al., 2014). In that study, also the concentrations of the CBC enzymes in the  
276 chloroplast were estimated based on the empirical protein abundance index (empPAI) (Ishihama et al.,  
277 2005). These data sets allowed estimating the number of substrate binding sites per CBC enzyme 20  
278 min after increasing the light intensity, when flux through the cycle was maximal (Mettler et al., 2014).  
279 To compare the empPAI-derived data with the QconCAT-derived data, we calculated the concentration  
280 of each CBC enzyme in the chloroplast based on the absolute quantities determined here and the  
281 assumption that a *Chlamydomonas* cell has a volume of  $270 \mu\text{m}^3$ , of which about half is occupied by  
282 the chloroplast (Weiss et al., 2000) (Table 2). While the concentration of rbcL determined by Mettler  
283 et al. (2014) matched that determined here with the QconCAT approach very well, the concentrations  
284 of all other CBC enzymes were strongly overestimated (between 8.8-fold for FBA3 and 34.5-fold for  
285 PRK1) (Table 2). To re-estimate the number of substrate binding sites per CBC enzyme, we used the  
286 concentrations of the CBC enzymes in the chloroplast determined here and the CBC metabolite data  
287 determined earlier 20 min after the light shift to  $145 \mu\text{mol photons m}^{-2} \text{ s}^{-1}$  (Mettler et al., 2014) (Table  
288 2). Although the growth conditions differed slightly between the two studies, metabolite levels do not  
289 vary greatly in *Chlamydomonas* in this irradiance range (Mettler et al., 2014, Supplemental Figure 12).

290 This re-analysis revealed that some CBC intermediates are indeed present at lower  
291 concentrations than the estimated binding site concentration of the enzymes for which they act as  
292 substrates (1,3-bisphosphoglycerate (BPGA) compared to PGK1 and GAP3; glyceraldehyde 3-  
293 phosphate (GAP) and erythrose 4-phosphate (E4P) compared to FBA3), some are at only slightly  
294 ( $< 4.5$ -fold) higher concentrations than the respective binding site (GAP and E4P compared to TRK;  
295 ribulose-5-phosphate (Ru5P) compared to PRK1; fructose-1,6-bisphosphate (FBP) compared to  
296 FBA3). However, most of the other CBC intermediates are present at considerably higher  
297 concentrations than the respective estimated binding site concentration (Figure 4).

## 298 4 Discussion

### 299 4.1 The modularity of the MoClo approach and the use of *Chlamydomonas* as a model facilitate 300 the iterative process of genetic engineering towards improving plant productivity

301 Here we present a workflow for rapid and efficient metabolic engineering towards improving plant  
302 biomass production, with the overexpression of native *Chlamydomonas* SBPase (SBP1) in  
303 *Chlamydomonas* as a proof-of-concept. We used the Modular Cloning (MoClo) strategy for construct  
304 generation and employed the part library established recently (Weber et al., 2011; Crozet et al., 2018).  
305 The one-step, modular assembly of multiple genetic parts allowed generating complex constructs  
306 rapidly and with variations: one coding for SBP1 with a 3xHA tag and one lacking any tags. This  
307 double strategy was well chosen, as the variant with a C-terminal 3xHA tag did not result in enhanced  
308 photosynthetic rates and biomass production, while the variant lacking a tag did (Figures 2A and 2B).  
309 In the two transformant lines tested for each construct, tagged SBP1 was overexpressed 1.6 to 1.7-fold  
310 while the untagged form was overexpressed ~2.2- and ~3-fold (Figure 3). Therefore, it is possible that  
311 in *Chlamydomonas* SBPase must be expressed to levels higher than 1.7-fold to improve the  
312 photosynthetic rate. Alternatively, the C-terminal 3xHA tag interfered with SBP1 function. We favor  
313 the latter explanation, because SBPase overexpression giving rise to at most 2-fold increased activities  
314 already had positive effects on photosynthetic rates and biomass accumulation in tobacco (Lefebvre et  
315 al., 2005; Tamoi et al., 2006; Rosenthal et al., 2011), *Dunaliella bardawil* (Fang et al., 2012), and wheat  
316 (Driever et al., 2017). Like for these models, increased photosynthetic rates and biomass accumulation  
317 were observed in *Chlamydomonas* lines overexpressing SBP1 only if cells were grown at higher light  
318 intensities ( $150 \mu\text{mol photons m}^{-2} \text{ s}^{-1}$ ) and elevated  $\text{CO}_2$  concentrations (in the presence of acetate)  
319 (Figure 2). Hence, under these conditions SBPase levels represent a bottleneck in flux through the CBC  
320 in *Chlamydomonas* as in the other plant models. Therefore, the results obtained with *Chlamydomonas*  
321 readily apply to other alga and land plants.

322 SBP1 represents 0.15% of total cell protein in *Chlamydomonas* (Table 1), i.e. the transgenic  
323 protein in the best SBP1-overexpressing line makes up 0.3% of total cell protein. It is likely that the  
324 screening of more transformants would have allowed recovering lines with even higher expression  
325 levels. Furthermore, a *SBP1* gene re-synthesized with optimal codon usage and the three *RBCS2* introns  
326 probably would have allowed higher expression levels (Barahimipour et al., 2015; Schroda, 2019). By  
327 combining the MoClo strategy with *Chlamydomonas* as a model, a complete cycle of the iterative  
328 process of construct design and assembly, transformation, screening, and phenotype test can be  
329 achieved in as little as 6 weeks.

### 330 4.2 QconCAT-based quantitative proteomics allows monitoring effects of SBP1 overexpression 331 on the accumulation of other CBC enzymes

332 Increased activities of SBPase by overexpressing SBPase alone or BiBPase from cyanobacteria had no  
333 effect on the levels or activities of selected other CBC enzymes in tobacco (Miyagawa et al.,  
334 2001; Lefebvre et al., 2005; Rosenthal et al., 2011), lettuce (Ichikawa et al., 2010) or wheat (Driever et  
335 al., 2017). In contrast, overexpression of BiBPase from *Synechocystis* in *Synechococcus* resulted in  
336 increased activities of Rubisco (2.4-fold) and aldolase (1.6-fold) as well as increased protein levels of  
337 *rbcl* (~3-fold), TPI (1.5-fold) and RPI (1.4-fold) (De Porcellinis et al., 2018). Similarly,  
338 overexpressing SBPase leading to up to 1.85-fold higher SBPase activity in *Arabidopsis* resulted in  
339 elevated FBPA activity and protein levels (Simkin et al., 2017a). We employed the QconCAT approach  
340 to determine absolute quantities of all other ten CBC enzymes and found no consistent changes  
341 between wild type and the four SBP1-overexpressing lines (Figure 3). Only the St12 line with ~2.2-  
342 fold higher SBP1 expression had a significant ~40% reduction of both Rubisco subunits *rbcl* and



343 RBCS. Since both Rubisco subunits were unaffected in line St1 with ~3-fold higher SBP1 levels, SBP1  
344 overexpression cannot be the cause for the reduced accumulation of Rubisco in line St12. More likely,  
345 a gene required for Rubisco expression, assembly or stability was destroyed by the integration of the  
346 SBP1 expression vector. It is surprising that photosynthetic rate and biomass accumulation was  
347 increased to a similar extent in lines St1 and St12 despite the reduced Rubisco levels in line St12  
348 (Figure 2). This indicates that Rubisco levels are not limiting CBC flux in *Chlamydomonas*, in line  
349 with previous observations in *Chlamydomonas* that reducing Rubisco to almost 50% of wild-type  
350 levels enabled full photosynthetic growth (Johnson, 2011).

#### 351 **4.3 CBC enzymes exhibit a larger abundance range than estimated earlier**

352 In addition to looking at possible effects of SBP1-overexpression on the expression of other CBC  
353 enzymes, the QconCAT approach allowed for the quantification of absolute levels of CBC enzymes in  
354 *Chlamydomonas* cells. With this strategy, we had already determined absolute quantities of rbcL and  
355 RBCS in another cell wall-deficient strain background (CC-1883) (Hammel et al., 2018). There,  
356 absolute amounts of rbcL and RBCS were ~1.4-fold lower than in UVM4 cells. However, CC-1883  
357 cells also had a ~1.3-fold lower protein content than UVM4 cells, such that the fraction of rbcL and  
358 RBCS in total cell protein are about comparable (6.6% and 1.3% in CC-1883 versus 6.88% and 1.45%  
359 in UVM4, respectively).

360 The abundance of all CBC enzymes in *Chlamydomonas* cells has been estimated earlier. One  
361 study used “Mass Western”, which is based on the spiking-in of known amounts of heavy isotope-  
362 labeled Q-peptides into tryptic digests of whole-cell proteins followed by LC-MS/MS analysis  
363 (Wienkoop et al., 2010). The other studies used the emPAI (empirical protein abundance index) and  
364 iBAQ (intensity-based absolute quantification) approaches on quantitative shotgun proteomics datasets  
365 (Mettler et al., 2014;Schroda et al., 2015).

366 The iBAQ-based ranking of protein abundances exactly reflects the quantities of the more  
367 abundant CBC enzymes determined here by the QconCAT approach (Table 2). Only the low-  
368 abundance CBC enzymes RPE1, RPI1 and TPI1 were ranked by iBAQ in the opposite order of their  
369 abundance determined by the QconCAT method. Most likely, this is due to the impaired accuracy of  
370 the iBAQ approach for less-abundant proteins (Soufi et al., 2015).

371 The absolute quantities determined by Mass Western roughly matched those determined with  
372 the QconCAT approach, except for RBCS, PGK1 and SBP1, which were 24.6-fold, 7.7-fold, and 13.3-  
373 fold lower (Table 2). As suggested earlier (Hammel et al., 2018), this discrepancy can be explained by  
374 an incomplete extraction of some proteins from whole-cell homogenates with the extraction protocol  
375 employed (Wienkoop et al., 2010).

376 In the study by Mettler et al. (2014), the cellular abundance of rbcL was estimated by  
377 densitometry on Coomassie-stained SDS-gels and was used to normalize the emPAI-derived  
378 quantification values of the other CBC enzymes. The estimated abundance of rbcL matches that  
379 determined here via the QconCAT approach (Table 2). However, the emPAI-derived values for the  
380 other CBC enzymes are much higher than those determined by QconCAT (up to 34.5-fold higher for  
381 PRK1). A likely cause for this strong overestimation is that proteins of very high abundance tend to  
382 exhibit a saturated emPAI signal (Ishihama et al., 2008). Consequently, the range of concentrations of  
383 CBC enzymes is much larger than estimated earlier. For example, the difference between the most  
384 abundant CBC protein rbcL and the least abundant TPI1 is 128-fold rather than only 7-fold (Table 2).

385 The strong overestimation of many CBC enzymes by the emPAI approach challenges the conclusion  
386 that many CBC intermediates are present at concentrations that are far lower than the estimated binding  
387 site concentration of the enzymes for which they act as substrates (Mettler et al., 2014). For example,  
388 the concentration of sedoheptulose-1,7-bisphosphate (SBP) is ~106-fold higher than that of SBP1  
389 rather than only ~6-fold as estimated previously (Figure 4). Moreover, comparisons of the *in vivo* SBP  
390 concentration and the modelled *in vivo*  $K_m$  for SBP1 indicate that SBP1 is likely to be near-saturated  
391 *in vivo* (Mettler et al., 2014). Hence, flux at SBPase is likely restricted by the degree of post-  
392 translational activation of SBP1 and SBP1 abundance. This explains better why an increase in CBC  
393 flux can be achieved by increasing SBP1 protein concentrations.

394 Still correct is that the concentration of GAP is below or slightly above the concentration of  
395 substrate binding sites of FBA3 and TRK1 (0.4-fold and 2.2-fold, respectively), as is E4P compared to  
396 FBA3 and TRK1 (0.5-fold and 2.7-fold, respectively). Furthermore, ribulose-5-phosphate (Ru5P) is  
397 only 4.3-fold above the binding site concentration of PRK, indicating that increased flux in the  
398 regeneration phase of the CBC to increase Ru5P levels will aid increase RuBP formation and fixation  
399 of CO<sub>2</sub>. The low concentration of these key CBC intermediates relative to their enzyme binding sites,  
400 together with the low concentration of these and further CBC intermediates relative to the likely *in vivo*  
401  $K_m$  values of CBC enzymes (Mettler et al., 2014), explains how RuBP regeneration speeds up when  
402 rising light intensity drives faster conversion of 3-phosphoglycerate to GAP.

#### 403 **4.4 Outlook**

404 The next step would be to stack multiple transgenes for the overexpression of CBC enzymes that in  
405 SBP1-overexpressing lines potentially become new bottlenecks for flux through the cycle. Indicative  
406 for this scenario is the finding that SBPase overexpression in *Arabidopsis* entailed an overexpression  
407 of FBPA (Simkin et al., 2017a). Moreover, overexpression of BiBPase in *Synechococcus* came along  
408 with an increase in levels of RPI and TPI (De Porcellinis et al., 2018), which are the CBC enzymes of  
409 lowest abundance in *Chlamydomonas* (Tables 1 and 2). More candidates for multigene stacking might  
410 be PGK1, TRK1, TPI1 and FBP1, whose substrates are in largest excess of the substrate binding sites  
411 (Figure 4). To our knowledge, there are yet no reports on the overexpression of PGK, RPI, and TPI  
412 (Simkin et al., 2019). Two studies report no or even negative effects upon TRK overexpression in rice  
413 and tobacco, respectively (Khozaei et al., 2015; Suzuki et al., 2017). Positive effects of FBPAse  
414 overexpression on photosynthetic rates and biomass accumulation were reported for numerous plant  
415 models – except for *Chlamydomonas* where FBP1 overexpression in the chloroplast had negative  
416 effects (Dejtisakdi and Miller, 2016). Apparently, the highly complex regulation of the CBC and its  
417 central role in cellular metabolism make predictions difficult. This is highlighted by recent work,  
418 indicating that the balance between different steps in the CBC varies from species to species (Arrivault  
419 et al., 2019; Borghi et al., 2019). Therefore, experimental test is the route of choice that with the  
420 combination of MoClo and *Chlamydomonas* can be pursued easily.

#### 421 **5 Conflict of Interest**

422 The authors declare that the research was conducted in the absence of any commercial or financial  
423 relationships that could be construed as a potential conflict of interest.

#### 424 **6 Author Contributions**

425 A.H. performed all experiments. F.S. designed the QconCAT protein and performed the LC-MS/MS  
426 analyses. A.H., and D.Z. analysed the data and were supervised by T.M., M.S., and M.Sc. M.Sc.  
427 conceived and supervised the work. M.Sc. wrote the article with contributions from all other authors.

428 **7 Funding**

429 This work was funded by the Deutsche Forschungsgemeinschaft (TRR 175, projects C02 and D02)  
430 and the Landesforschungsschwerpunkt BioComp.

431 **8 Acknowledgments**

432 We are grateful to Karin Gries for technical help.

433 **9 References**

- 434 Arrivault, S., Alexandre Moraes, T., Obata, T., Medeiros, D.B., Fernie, A.R., Boulouis, A., Ludwig,  
435 M., Lunn, J.E., Borghi, G.L., Schlereth, A., Guenther, M., and Stitt, M. (2019). Metabolite  
436 profiles reveal interspecific variation in operation of the Calvin-Benson cycle in both C4 and  
437 C3 plants. *J Exp Bot* 70, 1843-1858.
- 438 Barahimipour, R., Strenkert, D., Neupert, J., Schroda, M., Merchant, S.S., and Bock, R. (2015).  
439 Dissecting the contributions of GC content and codon usage to gene expression in the model  
440 alga *Chlamydomonas reinhardtii*. *Plant J*.
- 441 Beynon, R.J., Doherty, M.K., Pratt, J.M., and Gaskell, S.J. (2005). Multiplexed absolute  
442 quantification in proteomics using artificial QCAT proteins of concatenated signature  
443 peptides. *Nature Methods* 2, 587-589.
- 444 Borghi, G.L., Moraes, T.A., Gunther, M., Feil, R., Mengin, V., Lunn, J.E., Stitt, M., and Arrivault, S.  
445 (2019). Relationship between irradiance and levels of Calvin-Benson cycle and other  
446 intermediates in the model eudicot *Arabidopsis* and the model monocot rice. *J Exp Bot* 70,  
447 5809-5825.
- 448 Chida, H., Nakazawa, A., Akazaki, H., Hirano, T., Suruga, K., Ogawa, M., Satoh, T., Kadokura, K.,  
449 Yamada, S., Hakamata, W., Isobe, K., Ito, T., Ishii, R., Nishio, T., Sonoike, K., and Oku, T.  
450 (2007). Expression of the algal cytochrome c6 gene in *Arabidopsis* enhances photosynthesis  
451 and growth. *Plant Cell Physiol* 48, 948-957.
- 452 Crozet, P., Navarro, F.J., Willmund, F., Mehrshahi, P., Bakowski, K., Lauersen, K.J., Perez-Perez,  
453 M.E., Auroy, P., Gorchs Rovira, A., Sauret-Gueto, S., Niemeyer, J., Spaniol, B., Theis, J.,  
454 Trosch, R., Westrich, L.D., Vavitsas, K., Baier, T., Hubner, W., De Carpentier, F., Cassarini,  
455 M., Danon, A., Henri, J., Marchand, C.H., De Mia, M., Sarkissian, K., Baulcombe, D.C.,  
456 Peltier, G., Crespo, J.L., Kruse, O., Jensen, P.E., Schroda, M., Smith, A.G., and Lemaire, S.D.  
457 (2018). Birth of a photosynthetic chassis: a MoClo toolkit enabling synthetic biology in the  
458 microalga *Chlamydomonas reinhardtii*. *ACS Synth Biol* 7, 2074-2086.
- 459 De Porcellinis, A.J., Norgaard, H., Brey, L.M.F., Erstad, S.M., Jones, P.R., Heazlewood, J.L., and  
460 Sakuragi, Y. (2018). Overexpression of bifunctional fructose-1,6-  
461 biphosphatase/sedoheptulose-1,7-biphosphatase leads to enhanced photosynthesis and  
462 global reprogramming of carbon metabolism in *Synechococcus* sp. PCC 7002. *Metab Eng* 47,  
463 170-183.
- 464 Dejtisakdi, W., and Miller, S.M. (2016). Overexpression of Calvin cycle enzyme fructose 1,6-  
465 biphosphatase in *Chlamydomonas reinhardtii* has a detrimental effect on growth. *Algal*  
466 *research* 2016 v.14, pp. 11-126.

- 467 Ding, F., Wang, M., Zhang, S., and Ai, X. (2016). Changes in SBPase activity influence  
468 photosynthetic capacity, growth, and tolerance to chilling stress in transgenic tomato plants.  
469 *Sci Rep* 6, 32741.
- 470 Driever, S.M., Simkin, A.J., Alotaibi, S., Fisk, S.J., Madgwick, P.J., Sparks, C.A., Jones, H.D.,  
471 Lawson, T., Parry, M.a.J., and Raines, C.A. (2017). Increased SBPase activity improves  
472 photosynthesis and grain yield in wheat grown in greenhouse conditions. *Philos Trans R Soc*  
473 *Lond B Biol Sci* 372.
- 474 Fang, L., Lin, H.X., Low, C.S., Wu, M.H., Chow, Y., and Lee, Y.K. (2012). Expression of the  
475 *Chlamydomonas reinhardtii* sedoheptulose-1,7-bisphosphatase in *Dunaliella bardawil* leads to  
476 enhanced photosynthesis and increased glycerol production. *Plant Biotechnol J* 10, 1129-  
477 1135.
- 478 Feng, L., Han, Y., Liu, G., An, B., Yang, J., Yang, G., Li, Y., and Zhu, Y. (2007). Overexpression of  
479 sedoheptulose-1,7-bisphosphatase enhances photosynthesis and growth under salt stress in  
480 transgenic rice plants. *Functional Plant Biology* 34, 822-834.
- 481 Gibson, D.G., Young, L., Chuang, R.Y., Venter, J.C., Hutchison, C.A., 3rd, and Smith, H.O. (2009).  
482 Enzymatic assembly of DNA molecules up to several hundred kilobases. *Nat Methods* 6, 343-  
483 345.
- 484 Gillet, L.C., Leitner, A., and Aebersold, R. (2016). Mass Spectrometry Applied to Bottom-Up  
485 Proteomics: Entering the High-Throughput Era for Hypothesis Testing. *Annu Rev Anal Chem*  
486 (*Palo Alto Calif*) 9, 449-472.
- 487 Gong, H.Y., Li, Y., Fang, G., Hu, D.H., Jin, W.B., Wang, Z.H., and Li, Y.S. (2015). Transgenic Rice  
488 Expressing Ictb and FBP/Sbpase Derived from Cyanobacteria Exhibits Enhanced  
489 Photosynthesis and Mesophyll Conductance to CO<sub>2</sub>. *PLoS One* 10, e0140928.
- 490 Hammel, A., Zimmer, D., Sommer, F., Mühlhaus, T., and Schroda, M. (2018). Absolute  
491 quantification of major photosynthetic protein complexes in *Chlamydomonas reinhardtii*  
492 using quantification concatamers (QconCATs). *Front Plant Sci* 9, 1265.
- 493 Ichikawa, Y., Tamoi, M., Sakuyama, H., Maruta, T., Ashida, H., Yokota, A., and Shigeoka, S.  
494 (2010). Generation of transplastomic lettuce with enhanced growth and high yield. *GM Crops*  
495 1, 322-326.
- 496 Ishihama, Y., Oda, Y., Tabata, T., Sato, T., Nagasu, T., Rappsilber, J., and Mann, M. (2005).  
497 Exponentially modified protein abundance index (emPAI) for estimation of absolute protein  
498 amount in proteomics by the number of sequenced peptides per protein. *Mol Cell Proteomics*  
499 4, 1265-1272.
- 500 Ishihama, Y., Schmidt, T., Rappsilber, J., Mann, M., Hartl, F.U., Kerner, M.J., and Frishman, D.  
501 (2008). Protein abundance profiling of the *Escherichia coli* cytosol. *BMC Genomics* 9, 102.
- 502 Johnson, X. (2011). Manipulating RuBisCO accumulation in the green alga, *Chlamydomonas*  
503 *reinhardtii*. *Plant Mol Biol* 76, 397-405.
- 504 Kebeish, R., Niessen, M., Thiruvedhi, K., Bari, R., Hirsch, H.J., Rosenkranz, R., Stabler, N.,  
505 Schonfeld, B., Kreuzaler, F., and Peterhansel, C. (2007). Chloroplastic photorespiratory  
506 bypass increases photosynthesis and biomass production in *Arabidopsis thaliana*. *Nat*  
507 *Biotechnol* 25, 593-599.

- 508 Khozaei, M., Fisk, S., Lawson, T., Gibon, Y., Sulpice, R., Stitt, M., Lefebvre, S.C., and Raines, C.A.  
509 (2015). Overexpression of plastid transketolase in tobacco results in a thiamine auxotrophic  
510 phenotype. *Plant Cell* 27, 432-447.
- 511 Kindle, K.L. (1990). High-frequency nuclear transformation of *Chlamydomonas reinhardtii*. *Proc*  
512 *Natl Acad Sci U S A* 87, 1228-1232.
- 513 Kohler, I.H., Ruiz-Vera, U.M., Vanlooche, A., Thomey, M.L., Clemente, T., Long, S.P., Ort, D.R.,  
514 and Bernacchi, C.J. (2017). Expression of cyanobacterial FBP/SBPase in soybean prevents  
515 yield depression under future climate conditions. *J Exp Bot* 68, 715-726.
- 516 Kropat, J., Hong-Hermesdorf, A., Casero, D., Ent, P., Castruita, M., Pellegrini, M., Merchant, S.S.,  
517 and Malasarn, D. (2011). A revised mineral nutrient supplement increases biomass and  
518 growth rate in *Chlamydomonas reinhardtii*. *Plant J* 66, 770-780.
- 519 Kubis, A., and Bar-Even, A. (2019). Synthetic biology approaches for improving photosynthesis. *J*  
520 *Exp Bot* 70, 1425-1433.
- 521 Lefebvre, S., Lawson, T., Zakhleniuk, O.V., Lloyd, J.C., Raines, C.A., and Fryer, M. (2005).  
522 Increased sedoheptulose-1,7-bisphosphatase activity in transgenic tobacco plants stimulates  
523 photosynthesis and growth from an early stage in development. *Plant Physiol* 138, 451-460.
- 524 Lopez-Paz, C., Liu, D., Geng, S., and Umen, J.G. (2017). Identification of *Chlamydomonas*  
525 *reinhardtii* endogenous genic flanking sequences for improved transgene expression. *Plant J*  
526 92, 1232-1244.
- 527 Lowry, O.H., Rosebrough, N.J., Farr, A.L., and Randall, R.J. (1951). Protein measurement with the  
528 Folin phenol reagent. *J Biol Chem* 193, 265-275.
- 529 Mettler, T., Mühlhaus, T., Hemme, D., Schöttler, M.A., Rupprecht, J., Idoine, A., Veyel, D., Pal,  
530 S.K., Yaneva-Roder, L., Winck, F.V., Sommer, F., Vosloh, D., Seiwert, B., Erban, A.,  
531 Burgos, A., Arvidsson, S., Schönfelder, S., Arnold, A., Gunther, M., Krause, U., Lohse, M.,  
532 Kopka, J., Nikoloski, Z., Mueller-Roeber, B., Willmitzer, L., Bock, R., Schroda, M., and Stitt,  
533 M. (2014). Systems analysis of the response of photosynthesis, metabolism, and growth to an  
534 increase in irradiance in the photosynthetic model organism *Chlamydomonas reinhardtii*.  
535 *Plant Cell* 26, 2310-2350.
- 536 Miyagawa, Y., Tamoi, M., and Shigeoka, S. (2001). Overexpression of a cyanobacterial fructose-1,6-  
537 /sedoheptulose-1,7-bisphosphatase in tobacco enhances photosynthesis and growth. *Nat*  
538 *Biotechnol* 19, 965-969.
- 539 Neupert, J., Karcher, D., and Bock, R. (2009). Generation of *Chlamydomonas* strains that efficiently  
540 express nuclear transgenes. *Plant J* 57, 1140-1150.
- 541 Nolke, G., Houdelet, M., Kreuzaler, F., Peterhansel, C., and Schillberg, S. (2014). The expression of  
542 a recombinant glycolate dehydrogenase polyprotein in potato (*Solanum tuberosum*) plastids  
543 strongly enhances photosynthesis and tuber yield. *Plant Biotechnol J* 12, 734-742.
- 544 Ogawa, T., Tamoi, M., Kimura, A., Mine, A., Sakuyama, H., Yoshida, E., Maruta, T., Suzuki, K.,  
545 Ishikawa, T., and Shigeoka, S. (2015). Enhancement of photosynthetic capacity in *Euglena*  
546 *gracilis* by expression of cyanobacterial fructose-1,6-/sedoheptulose-1,7-bisphosphatase leads  
547 to increases in biomass and wax ester production. *Biotechnol Biofuels* 8, 80.
- 548 Patron, N.J., Orzaez, D., Marillonnet, S., Warzecha, H., Matthewman, C., Youles, M., Raitskin, O.,  
549 Leveau, A., Farre, G., Rogers, C., Smith, A., Hibberd, J., Webb, A.A., Locke, J., Schornack,  
550 S., Ajioka, J., Baulcombe, D.C., Zipfel, C., Kamoun, S., Jones, J.D., Kuhn, H., Robatzek, S.,

- 551 Van Esse, H.P., Sanders, D., Oldroyd, G., Martin, C., Field, R., O'connor, S., Fox, S., Wulff,  
552 B., Miller, B., Breakspear, A., Radhakrishnan, G., Delaux, P.M., Loque, D., Granell, A.,  
553 Tissier, A., Shih, P., Brutnell, T.P., Quick, W.P., Rischer, H., Fraser, P.D., Aharoni, A.,  
554 Raines, C., South, P.F., Ane, J.M., Hamberger, B.R., Langdale, J., Stougaard, J.,  
555 Bouwmeester, H., Udvardi, M., Murray, J.A., Ntoulakakis, V., Schafer, P., Denby, K.,  
556 Edwards, K.J., Osbourn, A., and Haseloff, J. (2015). Standards for plant synthetic biology: a  
557 common syntax for exchange of DNA parts. *New Phytol* 208, 13-19.
- 558 Pratt, J.M., Simpson, D.M., Doherty, M.K., Rivers, J., Gaskell, S.J., and Beynon, R.J. (2006).  
559 Multiplexed absolute quantification for proteomics using concatenated signature peptides  
560 encoded by QconCAT genes. *Nature Protocols* 1, 1029-1043.
- 561 Rappsilber, J., Mann, M., and Ishihama, Y. (2007). Protocol for micro-purification, enrichment, pre-  
562 fractionation and storage of peptides for proteomics using StageTips. *Nat Protoc* 2, 1896-  
563 1906.
- 564 Rosenthal, D.M., Locke, A.M., Khozaei, M., Raines, C.A., Long, S.P., and Ort, D.R. (2011). Over-  
565 expressing the C(3) photosynthesis cycle enzyme Sedoheptulose-1-7 Bisphosphatase  
566 improves photosynthetic carbon gain and yield under fully open air CO(2) fumigation  
567 (FACE). *BMC Plant Biol* 11, 123.
- 568 Schaff, J.E., Mbeunkui, F., Blackburn, K., Bird, D.M., and Goshe, M.B. (2008). SILIP: a novel stable  
569 isotope labeling method for in planta quantitative proteomic analysis. *Plant J* 56, 840-854.
- 570 Schroda, M. (2019). Good News for Nuclear Transgene Expression in Chlamydomonas. *Cells* 8.
- 571 Schroda, M., Hemme, D., and Mühlhaus, T. (2015). The *Chlamydomonas* heat stress response. *Plant*  
572 *J* 82, 466-480.
- 573 Simkin, A.J., Lopez-Calcagno, P.E., Davey, P.A., Headland, L.R., Lawson, T., Timm, S., Bauwe, H.,  
574 and Raines, C.A. (2017a). Simultaneous stimulation of sedoheptulose 1,7-bisphosphatase,  
575 fructose 1,6-bisphosphate aldolase and the photorespiratory glycine decarboxylase-H protein  
576 increases CO<sub>2</sub> assimilation, vegetative biomass and seed yield in Arabidopsis. *Plant*  
577 *Biotechnol J* 15, 805-816.
- 578 Simkin, A.J., Lopez-Calcagno, P.E., and Raines, C.A. (2019). Feeding the world: improving  
579 photosynthetic efficiency for sustainable crop production. *J Exp Bot* 70, 1119-1140.
- 580 Simkin, A.J., Mcausland, L., Lawson, T., and Raines, C.A. (2017b). Overexpression of the  
581 RieskeFeS Protein Increases Electron Transport Rates and Biomass Yield. *Plant Physiol* 175,  
582 134-145.
- 583 Soufi, B., Krug, K., Harst, A., and Macek, B. (2015). Characterization of the E. coli proteome and its  
584 modifications during growth and ethanol stress. *Front Microbiol* 6, 103.
- 585 Strenkert, D., Schmollinger, S., and Schroda, M. (2013). Heat shock factor 1 counteracts epigenetic  
586 silencing of nuclear transgenes in *Chlamydomonas reinhardtii*. *Nucleic Acids Res* 41, 5273-  
587 5289.
- 588 Suzuki, Y., Kondo, E., and Makino, A. (2017). Effects of co-overexpression of the genes of Rubisco  
589 and transketolase on photosynthesis in rice. *Photosynth Res* 131, 281-289.
- 590 Tamoi, M., Nagaoka, M., Miyagawa, Y., and Shigeoka, S. (2006). Contribution of fructose-1,6-  
591 bisphosphatase and sedoheptulose-1,7-bisphosphatase to the photosynthetic rate and carbon  
592 flow in the Calvin cycle in transgenic plants. *Plant Cell Physiol* 47, 380-390.

- 593 Vernon, L.P. (1960). Spectrophotometric Determination of Chlorophylls and Pheophytins in Plant  
594 Extracts. *Analytical Chemistry* 32, 1144-1150.
- 595 Weber, E., Engler, C., Gruetzner, R., Werner, S., and Marillonnet, S. (2011). A modular cloning  
596 system for standardized assembly of multigene constructs. *PLoS One* 6, e16765.
- 597 Weiss, D., Schneider, G., Niemann, B., Guttman, P., Rudolph, D., and Schmahl, G. (2000).  
598 Computed tomography of cryogenic biological specimens based on X-ray microscopic  
599 images. *Ultramicroscopy* 84, 185-197.
- 600 Wienkoop, S., Weiss, J., May, P., Kempa, S., Irgang, S., Recuenco-Munoz, L., Pietzke, M.,  
601 Schwemmer, T., Rupprecht, J., Egelhofer, V., and Weckwerth, W. (2010). Targeted  
602 proteomics for *Chlamydomonas reinhardtii* combined with rapid subcellular protein  
603 fractionation, metabolomics and metabolic flux analyses. *Mol Biosyst* 6, 1018-1031.
- 604 Wykoff, D.D., Davies, J.P., Melis, A., and Grossman, A.R. (1998). The regulation of photosynthetic  
605 electron transport during nutrient deprivation in *Chlamydomonas reinhardtii*. *Plant Physiol*  
606 117, 129-139.
- 607 Yabuta, Y., Tamoi, M., Yamamoto, K., Tomizawa, K.-I., Yokota, A., and Shigeoka, S. (2008).  
608 Molecular Design of Photosynthesis-Elevated Chloroplasts for Mass Accumulation of a  
609 Foreign Protein. *Plant and Cell Physiology* 49, 375-385.
- 610 Zimmer, D., Schneider, K., Sommer, F., Schroda, M., and Mühlhaus, T. (2018). Artificial  
611 intelligence understands peptide observability and assists with absolute protein quantification.  
612 *Front Plant Sci* 9, 1559.

## 613 **10 Figure legends**

### 614 **Figure 1. Generation of *Chlamydomonas* lines overexpressing SBP1.**

615 (A) SBP1 construct used for transformation. The 2172 bp *SBP1* ORF (exons shown as black boxes),  
616 interrupted by all native *SBP1* introns (thin lines), was domesticated to generate a level 0 module for  
617 the MoClo strategy. Using MoClo, the *SBP1* ORF was equipped with the *HSP70A-RBCS2* promoter  
618 and the RPL23 terminator (pAR and tRPL23, respectively, white boxes) and with a 3xHA-tag or  
619 without a tag (mStop) (grey box), giving rise to two level 1 constructs. These were combined with  
620 another level 1 construct containing the *aadA* gene conferring resistance to spectinomycin (light grey  
621 box) to yield the final level 2 constructs for transformation

622 (B) Screening of transformants overexpressing SBP1. The UVM4 strain was transformed with the level  
623 2 constructs shown in (A). Total cell proteins from 12 spectinomycin resistant transformants recovered  
624 with each construct were extracted and proteins corresponding to 1.5 µg chlorophyll were analyzed by  
625 immunoblotting using anti-HA or anti-SBPase antibodies. Transformants exhibiting highest expression  
626 levels for SBP1-3HA or SBP1-mStop (red) were used for further analysis.

627

### 628 **Figure 2. Growth and light response curves of SBP1-overexpressing lines versus the UVM4** 629 **recipient strain.**

630 (A) Growth curves under mixotrophic conditions. Cultures were inoculated in TAP medium at a  
631 density of  $3 \times 10^5$  cells ml<sup>-1</sup> and incubated on a rotatory shaker for 4 days at a light intensity of 150  
632 µmol photons m<sup>-2</sup> s<sup>-1</sup>. The culture volume (cell density x cell size) was determined with a Coulter  
633 counter. Error bars indicate SD, n = 3. Asterisks indicate significant differences to the UVM4 strain, p  
634 < 0.001 (one-way ANOVA with Dunnett's multiple comparison test).

635 (B) Light response curves. Cells were grown mixotrophically to mid-log phase and oxygen evolution  
636 at the indicated light intensities was measured on a Mini-PAM II with needle-type oxygen microsensor

637 OXR-50. Error bars indicate SD,  $n = 3$ . Asterisks indicate significant differences to the UVM4 strain,  
638  $p < 0.05$  (one-way ANOVA with Dunnett's multiple comparison test).

639 (C) Growth curves under photoautotrophic conditions. Cultures were inoculated in HMP medium at a  
640 density of  $3 \times 10^5$  cells  $\text{ml}^{-1}$  and incubated on a rotatory shaker for 10 days at a light intensity of 150  
641  $\mu\text{mol photons m}^{-2} \text{s}^{-1}$ . The culture volume (cell density  $\times$  cell size) was determined with a Coulter  
642 counter. Error bars indicate SD,  $n = 3$ .

643

644 **Figure 3. Changes in abundance of CBC enzymes in SBP1-overexpressing lines versus the UVM4**  
645 **recipient strain.** The abundance of the CBC enzymes in transformants HA5 and HA11, generated with  
646 the SBP1-3xHA construct, and in transformants St1 and St12, generated with the SBP1-mStop  
647 construct, was determined using the QconCAT strategy. Abundances relative to those in the UVM4  
648 recipient strain were log2 transformed and plotted. Asterisks designate significant differences between  
649 enzymes in the transformants versus the UVM4 strain (Kruskal-Wallis test with Dunn's post hoc test,  
650  $p < 0.01$ ). PGK, phosphoglycerate kinase; GAP, glyceraldehyde-3-phosphate dehydrogenase; TPI,  
651 triose phosphate isomerase; FBA/SBA, fructose-1,6-bisphosphate aldolase/ sedoheptulose-1,7-  
652 bisphosphate aldolase; FBP, fructose-1,6-bisphosphatase; TRK, transketolase; SBP, sedoheptulose-  
653 1,7-bisphosphatase; RPE, ribulose-5-phosphate 3-epimerase; RPI, ribose-5-phosphate isomerase;  
654 PRK, phosphoribulokinase; rbcL, ribulose bisphosphate carboxylase/oxygenase large subunit; RBCS,  
655 ribulose bisphosphate carboxylase/oxygenase small subunit.

656

657 **Figure 4. Substrate per binding sites versus substrate concentrations.**

658 Substrates of CBC reactions, determined by LC-MS/MS, were taken from Mettler et al. (2014).  
659 Binding sites of CBC enzymes were calculated based on the QconCAT data (Table 2). Substrate per  
660 binding site values of CBC reactions are plotted against the substrate level 20 min after the light  
661 intensity was increased from 41 to 145  $\mu\text{mol photons m}^{-2} \text{s}^{-1}$ . For enzymes that catalyze readily  
662 reversible reactions (TPI, FBA/SBA, TRK, RPI, RPE) the relation to product level is also shown. To  
663 facilitate comparison, the same numbering and color code as used in Mettler et al. (2014) was adopted.  
664 The blue arrow shows the estimates for substrates per binding site for the SBP1 overexpressing lines  
665 St1 and St12 (encircled in red). The two values for Rubisco are based on the slightly different  
666 quantification values for the large and small subunits.

667



## Overexpression of SBP1 in *Chlamydomonas*

668

**Table 1.** Absolute quantification of Calvin-Benson-Cycle proteins in the *Chlamydomonas* UVM4 strain.

| Protein     | Peptide             | amol/cell <sup>a</sup> | n  | amol/cell <sup>b</sup> | % of total cell protein <sup>c</sup> | d::pPop rank/score |
|-------------|---------------------|------------------------|----|------------------------|--------------------------------------|--------------------|
| <b>rbcL</b> | DTDILAAFR           | 37.7 ± 6.6             | 24 | 36.2                   | 6.88                                 | 1 / 1.0            |
|             | LTYYTPDYVVR         | 35.9 ± 5.6             | 24 |                        |                                      | 2 / 0.73           |
|             | FLFVAEAIYK          | 37.5 ± 4.6             | 24 |                        |                                      | 3 / 0.68           |
| <b>RBCS</b> | AFPDAYVR            | 29.0 ± 7.2             | 11 | 24.6                   | 1.45                                 | 1 / 1.0            |
|             | AYVSNESAIR          | 22.2 ± 3.1             | 24 |                        |                                      | 2 / 1.0            |
|             | LVAFDNQK            | 29.3 ± 4.6             | 19 |                        |                                      | 3 / 0.82           |
| <b>PGK1</b> | ADLNVPLDK           | 1.6 ± 0.4              | 24 | 2.0                    | 0.31                                 | 3 / 0.83           |
|             | LSELLGKPVTK         | 2.1 ± 0.4              | 23 |                        |                                      | 25 / 0.24          |
|             | TFNDALADAK          | 2.4 ± 0.4              | 24 |                        |                                      | 11 / 0.65          |
| <b>GAP3</b> | AVSLVPLSLK          | 6.8 ± 1.5              | 24 | 6.6                    | 0.91                                 | 10 / 0.45          |
|             | VLITAPAK            | 6.9 ± 1.1              | 12 |                        |                                      | 1 / 1.0            |
| <b>TPI1</b> | LVDELNAGTIPR        | 0.3 ± 0.1              | 23 | 0.3                    | 0.03                                 | 1 / 1.0            |
|             | SLFGESNEVVAK        | 0.4 ± 0.2              | 20 |                        |                                      | 3 / 0.47           |
| <b>FBA3</b> | ALQNTVLK            | 11.5 ± 2.5             | 24 | 10.1                   | 1.4                                  | 4 / 0.50           |
|             | SVVSIHPGPSIIAAR     | 8.8 ± 1.5              | 24 |                        |                                      | 1 / 1.0            |
| <b>FBP1</b> | IYSFNEGNYGLWDDSVK   | 1.9 ± 1.3              | 24 | 0.5                    | 0.08                                 | 12 / 0.26          |
|             | TLLYGGIYGYPGDAK     | 0.5 ± 0.1              | 23 |                        |                                      | 7 / 0.48           |
|             | VPLFIGSK            | 0.2 ± 0.04             | 12 |                        |                                      | 1 / 1.0            |
| <b>SBP1</b> | LLFEALK             | 1.3 ± 0.3              | 12 | 1.2                    | 0.15                                 | 2 / 1.0            |
|             | LTNITGR             | 1.1 ± 0.3              | 11 |                        |                                      | 9 / 0.52           |
| <b>TRK1</b> | FLAIDAINK           | 3.2 ± 0.8              | 23 | 2.0                    | 0.53                                 | 2 / 0.90           |
|             | NPDFFNR             | 1.5 ± 0.4              | 19 |                        |                                      | 4 / 0.66           |
|             | VSTLIGYGSPNK        | 1.9 ± 0.5              | 24 |                        |                                      | 5 / 0.56           |
| <b>RPE1</b> | FIESQVAK            | 0.4 ± 0.1              | 8  | 0.4                    | 0.04                                 | 3 / 0.80           |
|             | GVNPWIEVDGGVTPENAYK | 1.2 ± 0.4              | 21 |                        |                                      | 5 / 0.66           |
|             | SDIIVSPSILSADFSR    | 0.2 ± 0.4              | 22 |                        |                                      | 1 / 1.0            |
| <b>RPI1</b> | LANLPEVK            | 0.4 ± 0.1              | 20 | 0.3                    | 0.03                                 | 2 / 0.78           |
|             | LQNVIGVPTSIR        | 0.4 ± 0.1              | 24 |                        |                                      | 1 / 1.0            |
| <b>PRK1</b> | GHSLESIK            | 3.9 ± 1.4              | 18 | 1.8                    | 0.25                                 | 11 / 0.26          |
|             | IYLDISDDIK          | 1.6 ± 0.3              | 24 |                        |                                      | 6 / 0.65           |
|             | VAELLDK             | 1.5 ± 0.2              | 12 |                        |                                      | 1 / 1.0            |

669  
670  
671  
672

<sup>a</sup> mean ± SD

<sup>b</sup> median of all values

<sup>c</sup> based on median and using MWs of mature proteins (Supplemental Dataset 2)

## Overexpression of SBP1 in *Chlamydomonas*

673  
674

**Table 2.** Comparison of CBC enzyme abundances and concentrations in *Chlamydomonas* determined in different studies by different methods.

|               | <b>Rank among CBC enzymes</b><br>(this study) | <b>Rank in proteome</b><br>(Schroda et al., 2015) | <b>amol/cell</b><br>(this study) | <b>amol/cell</b><br>(Wienkoop et al., 2010) | <b>μM in chloroplast</b><br>(Mettler et al., 2014) | <b>μM in chloroplast</b><br>(this study) |
|---------------|-----------------------------------------------|---------------------------------------------------|----------------------------------|---------------------------------------------|----------------------------------------------------|------------------------------------------|
| <b>Method</b> | QconCAT                                       | iBAQ                                              | QconCAT                          | Mass Western                                | emPAI                                              | QconCAT                                  |
| <b>rbcL</b>   | 1                                             | 2                                                 | 36.2                             | 42.2                                        | 304.5                                              | 268.2                                    |
| <b>RBCS</b>   | 2                                             | 6                                                 | 24.6                             | 1.0                                         | nd                                                 | 182.5                                    |
| <b>FBA3</b>   | 3                                             | 9                                                 | 10.1                             | 4.2                                         | 658.5                                              | 75.1                                     |
| <b>GAP3</b>   | 4                                             | 30                                                | 6.6                              | 1.8                                         | 651.5                                              | 48.9                                     |
| <b>PGK1</b>   | 5                                             | 49                                                | 2.0                              | 0.26                                        | 477.2                                              | 14.9                                     |
| <b>TRK1</b>   | 6                                             | 43                                                | 2.0                              | 1.43                                        | 232.2                                              | 14.8                                     |
| <b>PRK1</b>   | 7                                             | 66                                                | 1.8                              | 1.67                                        | 451.3                                              | 13.1                                     |
| <b>SBP1</b>   | 8                                             | 138                                               | 1.2                              | 0.09                                        | 149.6                                              | 8.7                                      |
| <b>FBP1</b>   | 9                                             | 185                                               | 0.55                             | 0.23                                        | 121.0                                              | 4.1                                      |
| <b>RPE1</b>   | 10                                            | 394                                               | 0.45                             | 0.2                                         | 87.7                                               | 3.3                                      |
| <b>RPI1</b>   | 11                                            | 294                                               | 0.34                             | 0.35                                        | 68.1                                               | 2.5                                      |
| <b>TPI1</b>   | 12                                            | 276                                               | 0.28                             | 0.16                                        | 44.3                                               | 2.1                                      |

675

676

Figure 1

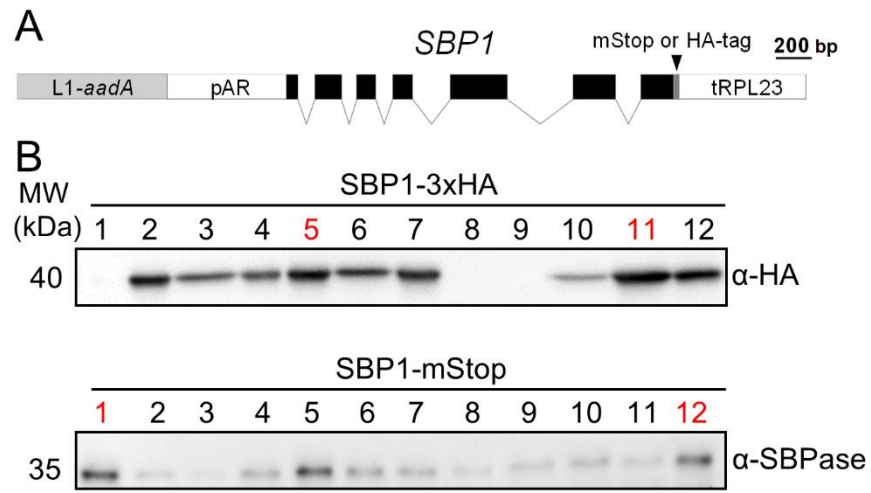

677

Figure 2

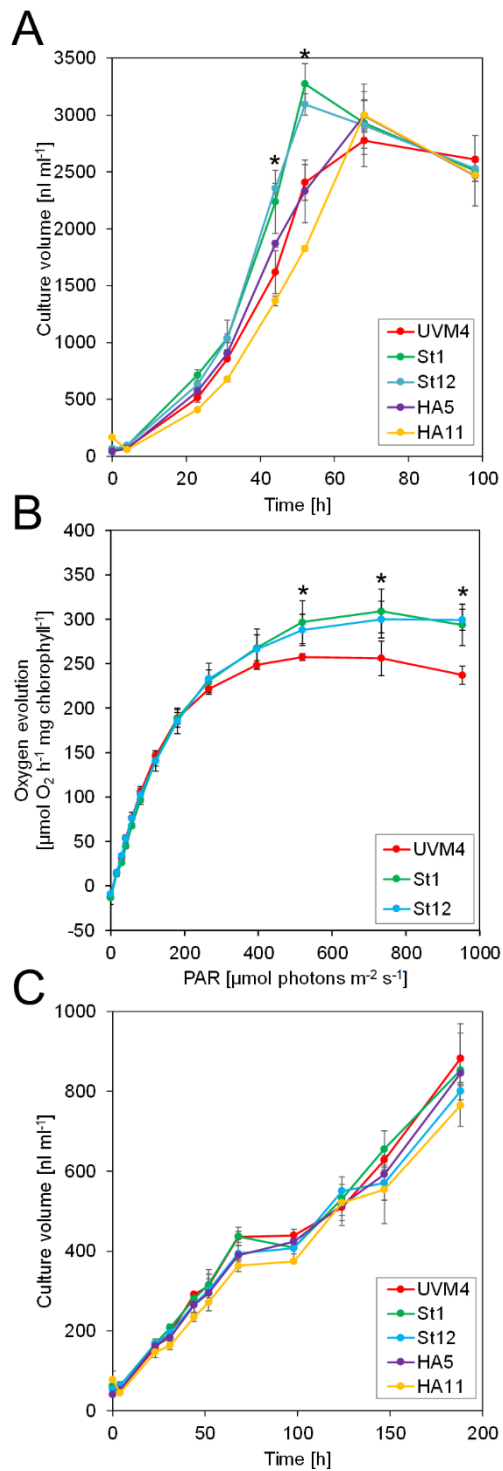

678

Figure 3

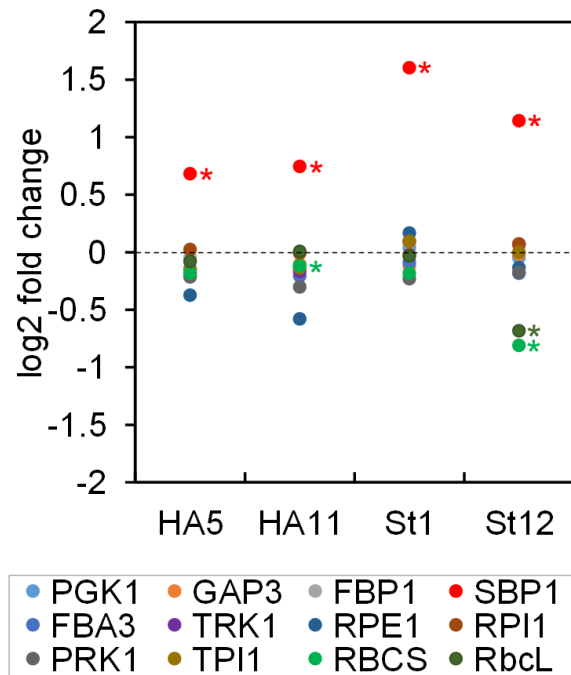

679

680

Figure 4

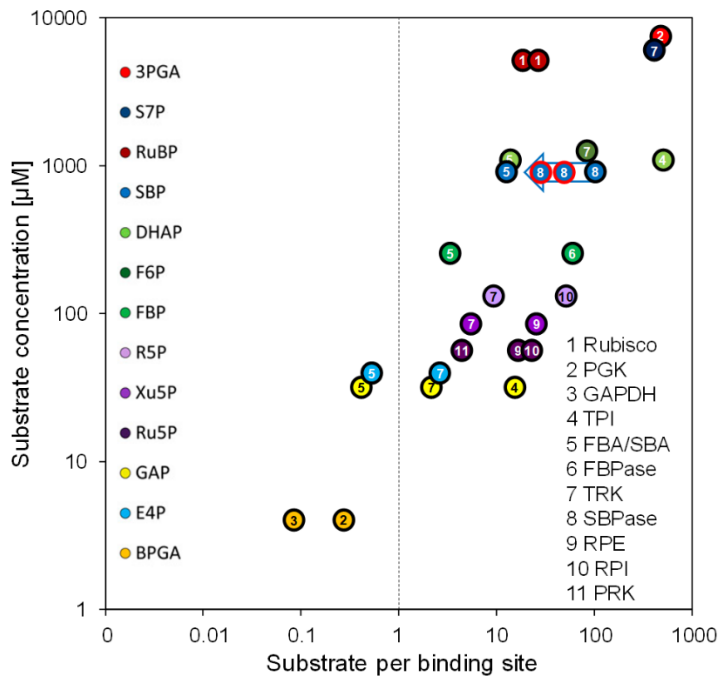

681

Supplemental Figure 1

A

```

MASMTGGQQMRDPAGAKLGGNEQVTRADLNVELDKTFNDALADAKLSELLGRFVTKAVSLVLPSPKVLIT
N-terminus . . . iRT . . . PGK . . . GAP3
APAKALQNTVLKVMFEGILKSVVSIIPHGFSIIAARVPLFIGSKTLLYGGIYVPGDAKIYSFNENGYGLW
. . . FBA3 . . . FBP1
DDSVKLTNITGRLLFEALKFLAIDAINKVSTLIGYGFNKNPDPFFNRFIESQVAKGVNFWIEVDGQVTPEN
. . . SBP1 . . . TRK1 . . . RPE1
AYKSDIIVSPSILSADFSRIYLDISDDIKVAELLDKFKGHSLESIKSLFGESNEVVAKLVDELNAGTIPRLA
. . . RPE1 . . . PRK1 . . . TPI1
NLPEVKLQNIIVGVPVTSIRITQLSQDELKSGQPVDLNKAEAAALVRSNSTFLGSRGILASD
. . . RPI1 . . . CP12 . . . RMT1
ESNATTKGALQSSTLKVSAADVARALQASVLKVTAAALASGRNLALELVRSAEGLDASASLRAAWSHHHH
. . . FBA1 . . . FBA2 . . . Cre07g338451 . . . iRT . . .
HHHKAWASWASKLAAALEHHHHHH
HIS-tag
    
```

B

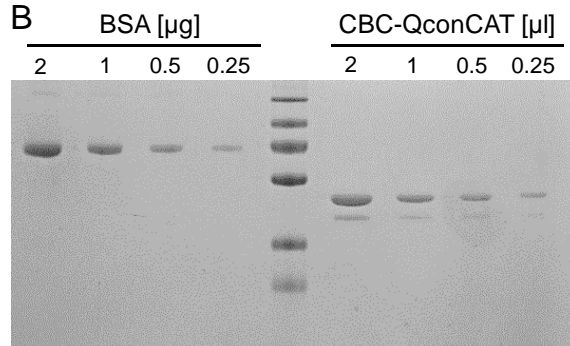

C

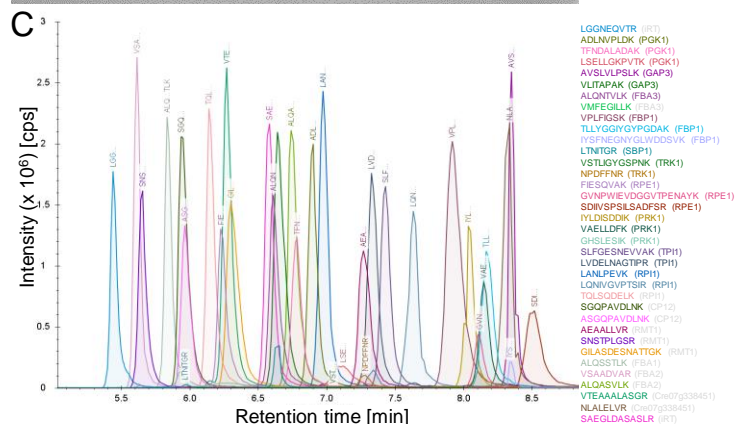

682

683 **Supplemental Figure 1. Design and production of the Calvin-Benson-Cycle (CBC) QconCAT**  
 684 **protein.**

685 (A) Sequence of the CBC-Qprot and protein source of selected Q-peptides. Peptides in grey were  
 686 erroneously included (CP12), have a proline following the tryptic cleavage site in the native context  
 687 (FBA3), or belong to a fructose-bisphosphatase not involved in the Calvin-Benson-Cycle  
 688 (Cre07.g338451). iRT peptides can be used for retention time alignment.

689 (B) The purified, <sup>15</sup>N-labeled CBC-Qprot was quantified on a NanoDrop spectrophotometer and the  
 690 concentration adjusted to 1 µg/µl. The indicated volumes of the CBC-Qprot were then separated next  
 691 to a BSA standard on a 12%-SDS polyacrylamide gel and stained with Coomassie blue. The labeling  
 692 efficiency of the CBC-Qprot was 99.39% ± 0.37%.

693 (C) Extracted ion chromatograms (XICs) of the proteotypic <sup>15</sup>N labeled Q-peptides derived from the  
 694 PS-Qprot. The purified protein was tryptically digested and run on a short 6-min HPLC gradient. XICs  
 695 of the resolved peptides were extracted using the PeakView software (ABSciex). Peptides for which  
 696 the corresponding protein name is given in grey were not used for quantification. Note that due to the  
 697 very short not all peptides were detected within the retention time window.
